# Supplementary material
Source: PubMed Central journal article supplement (PMC3275389)

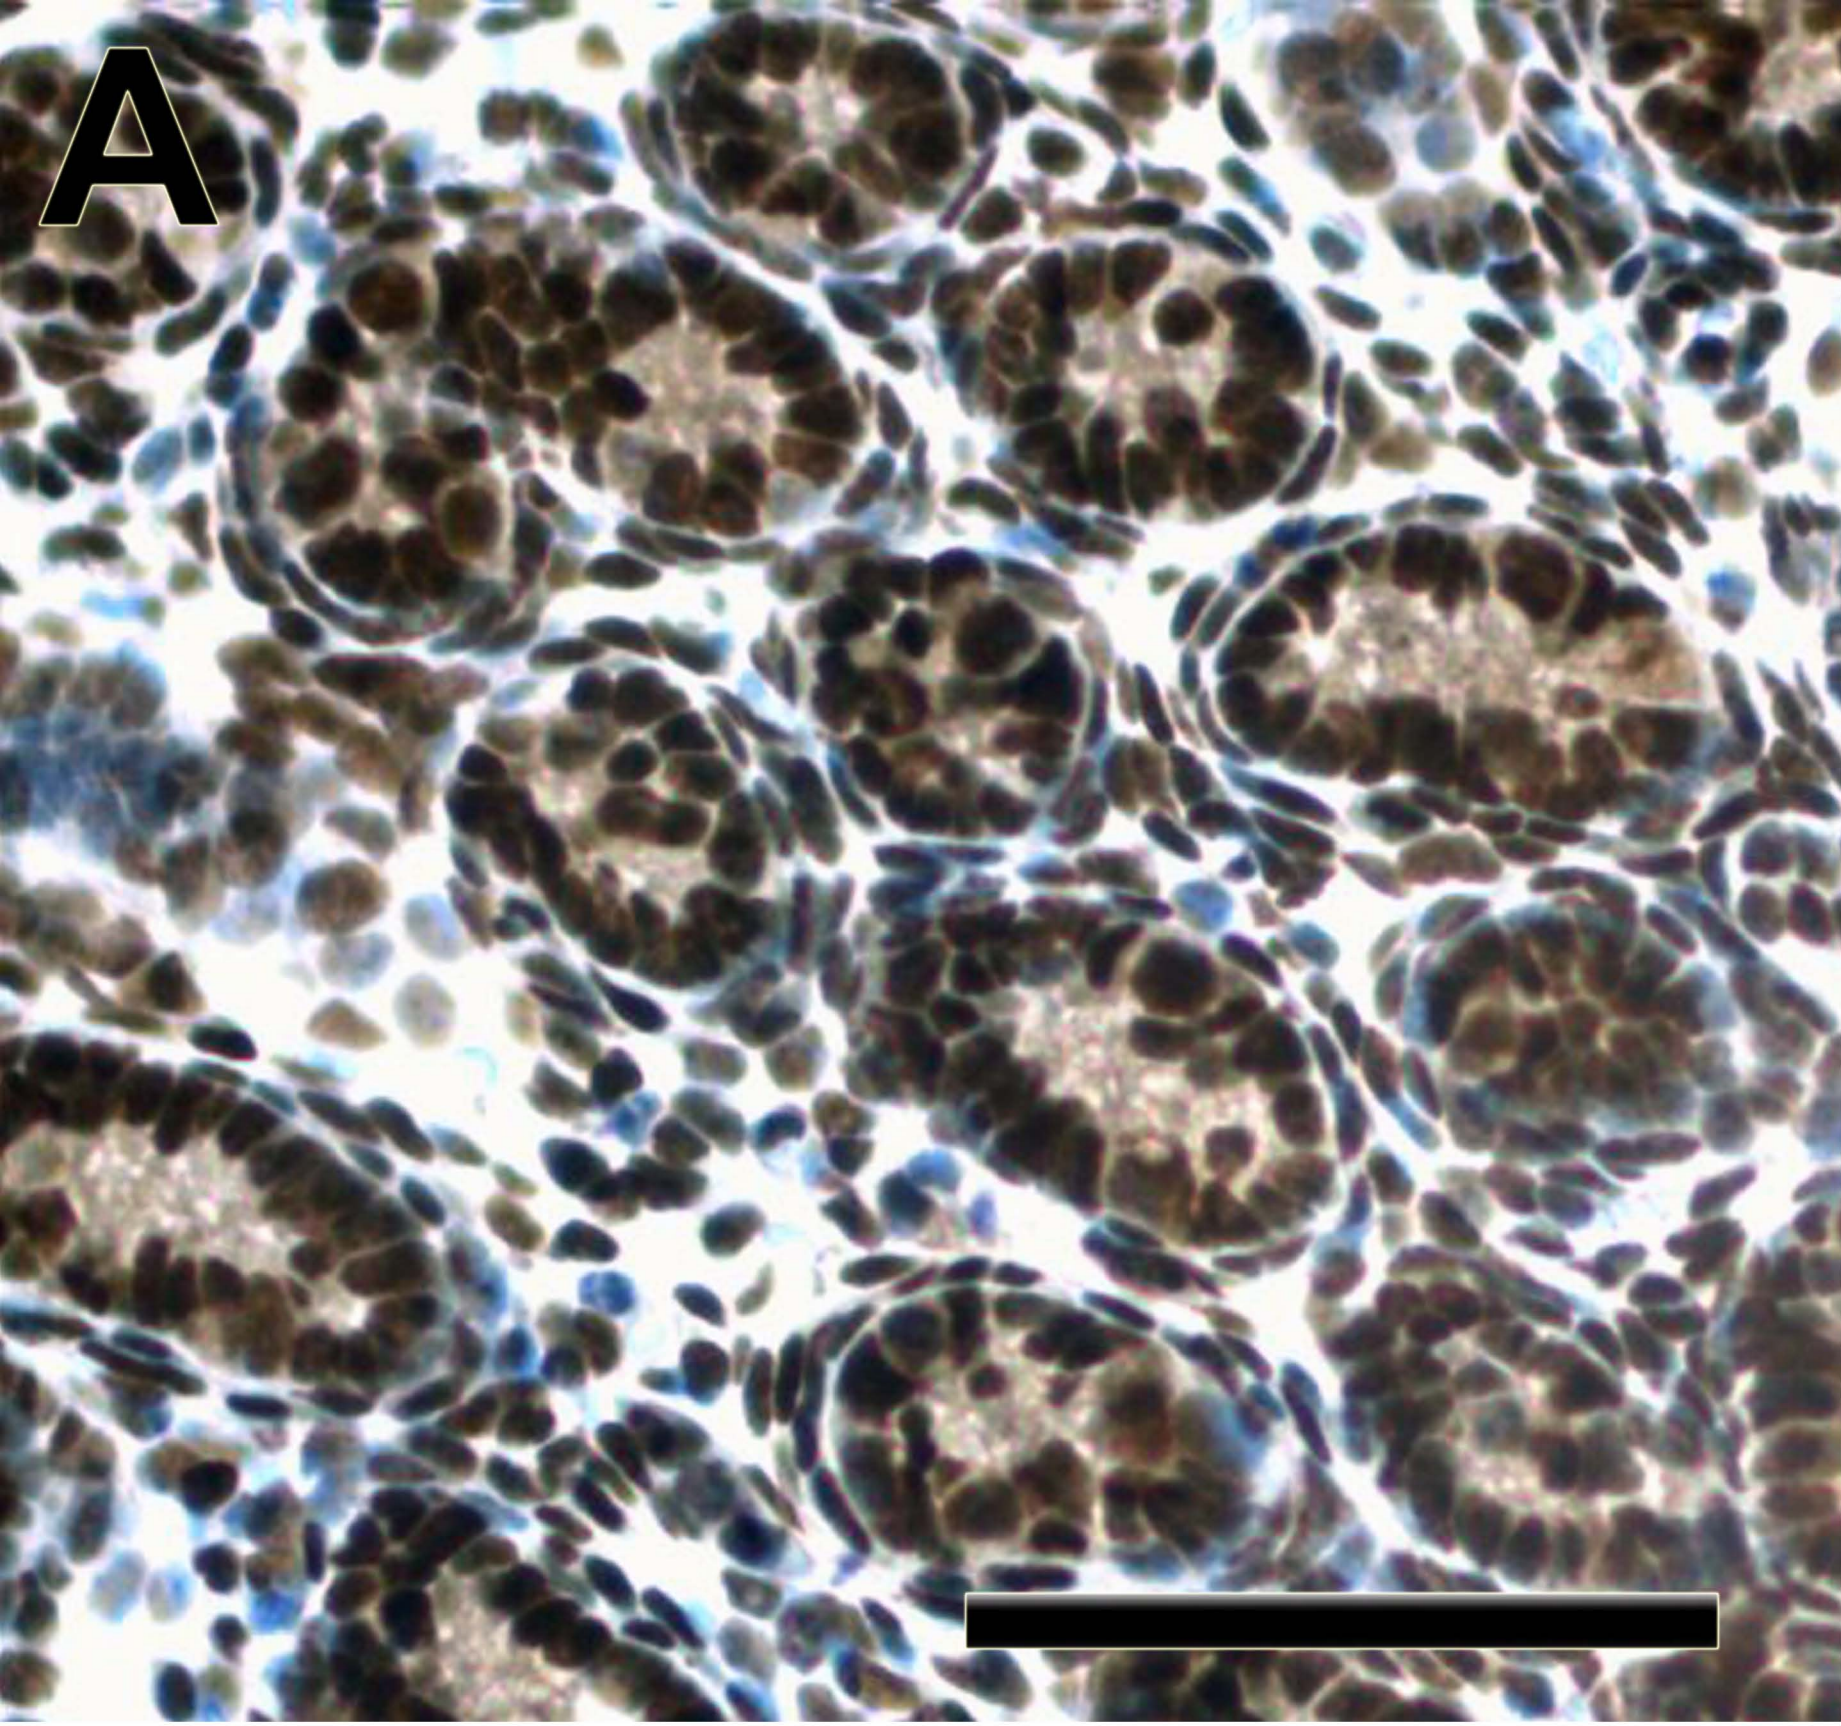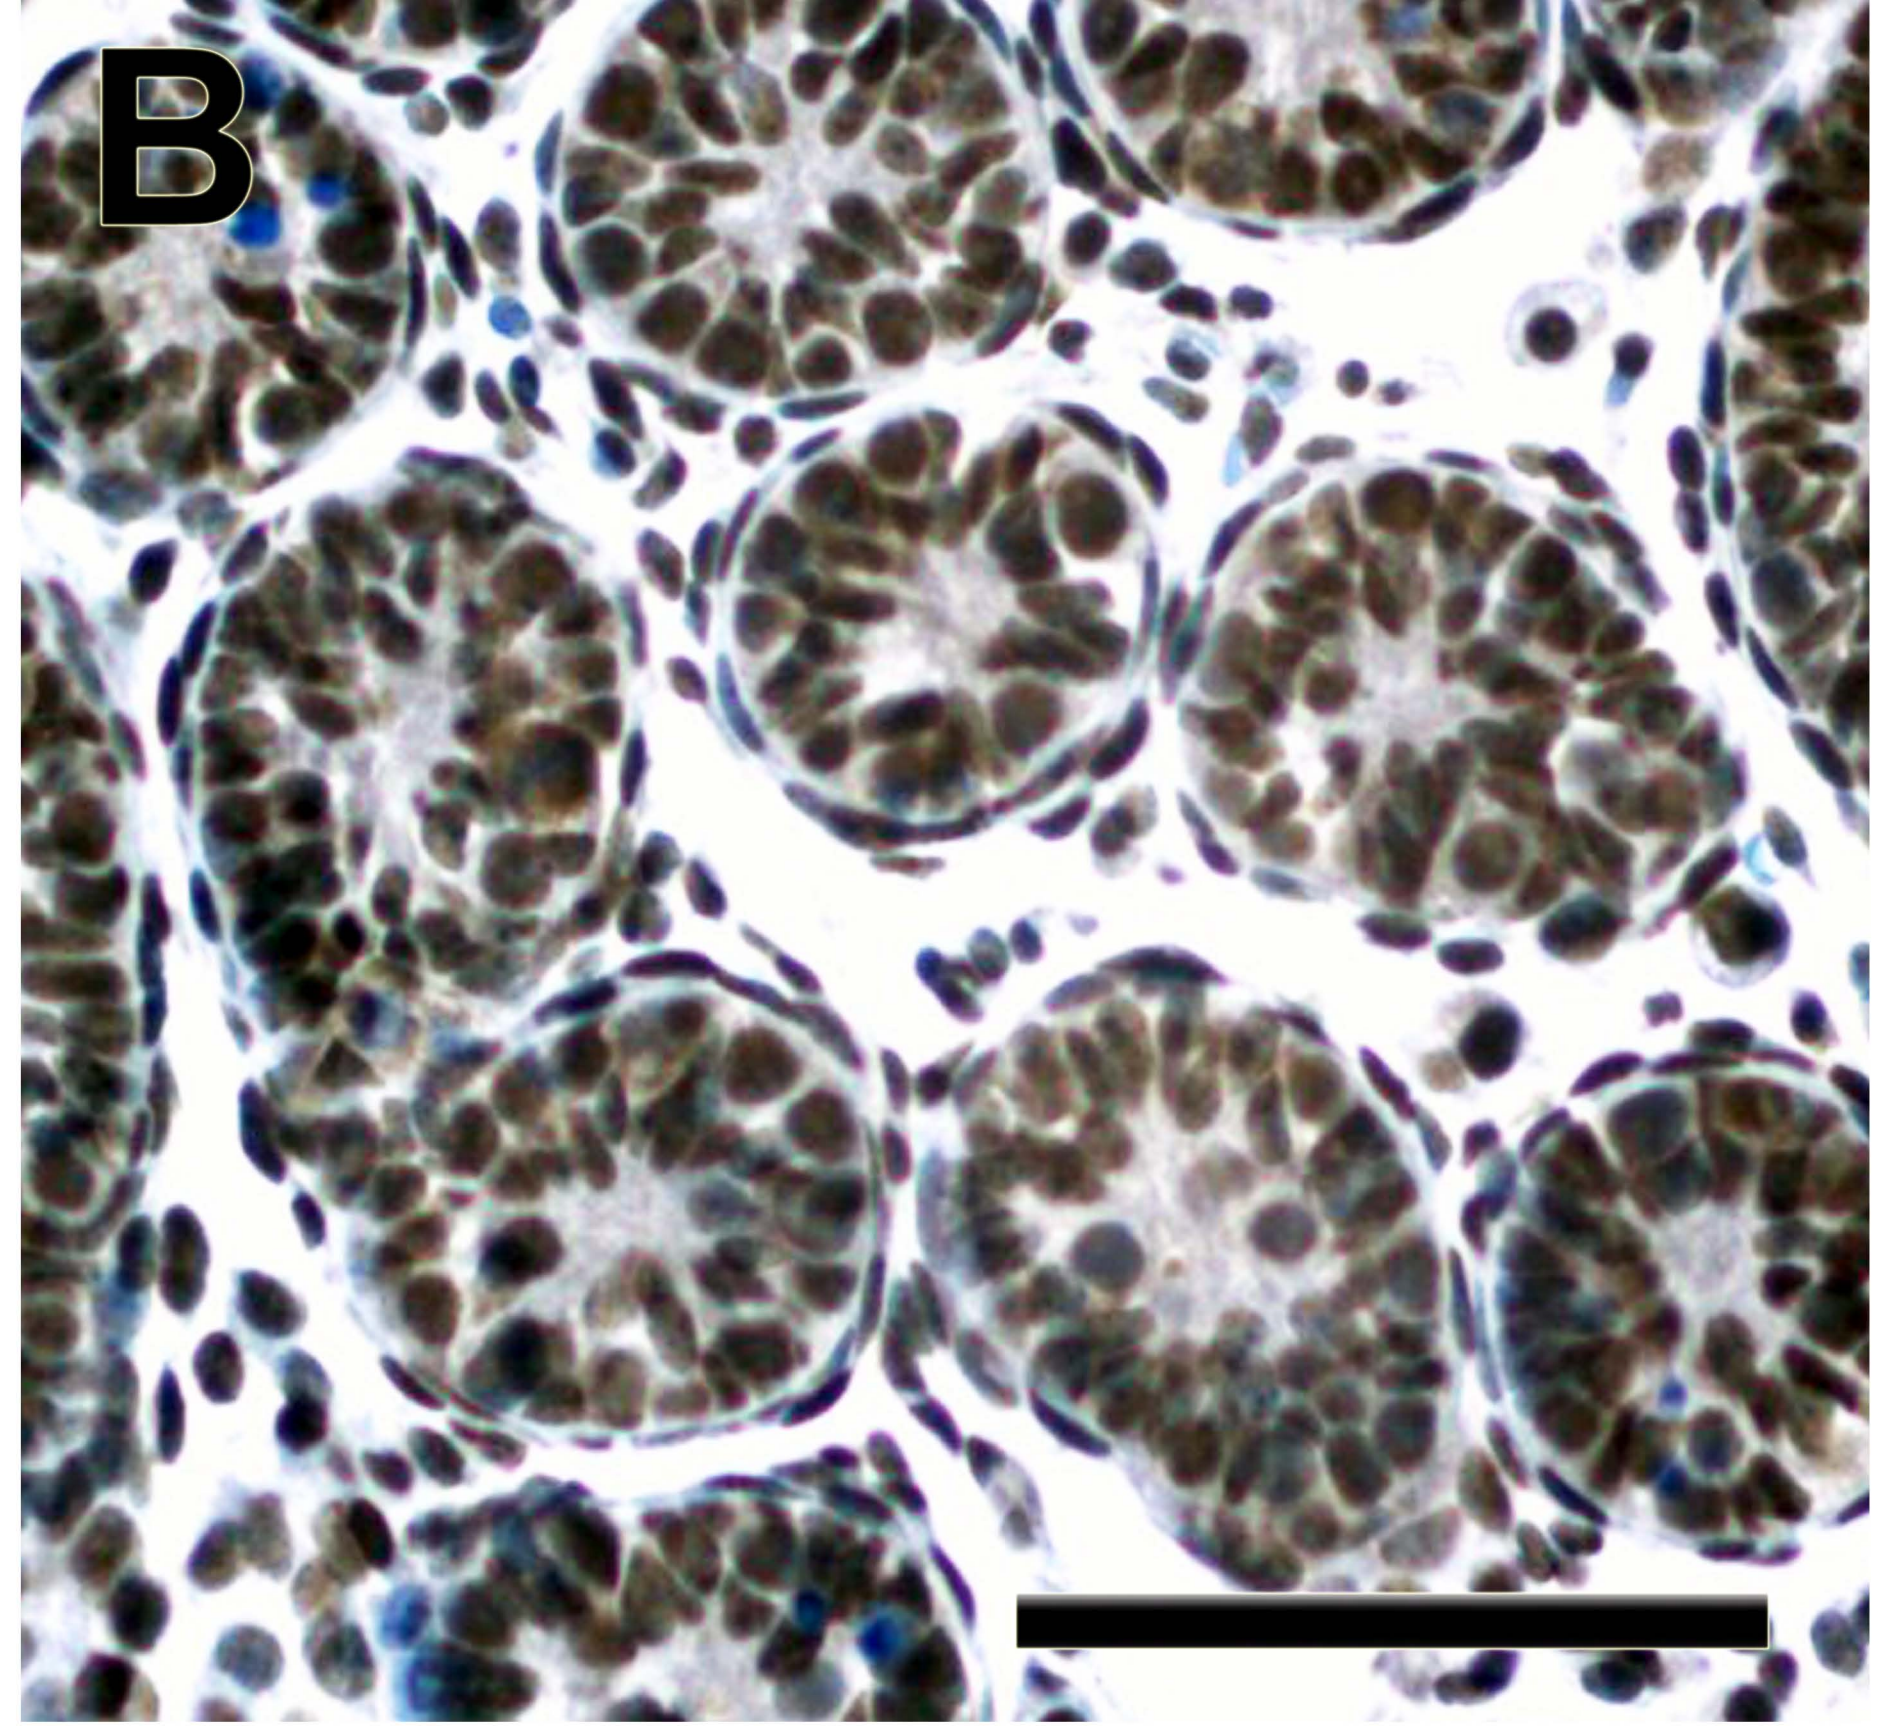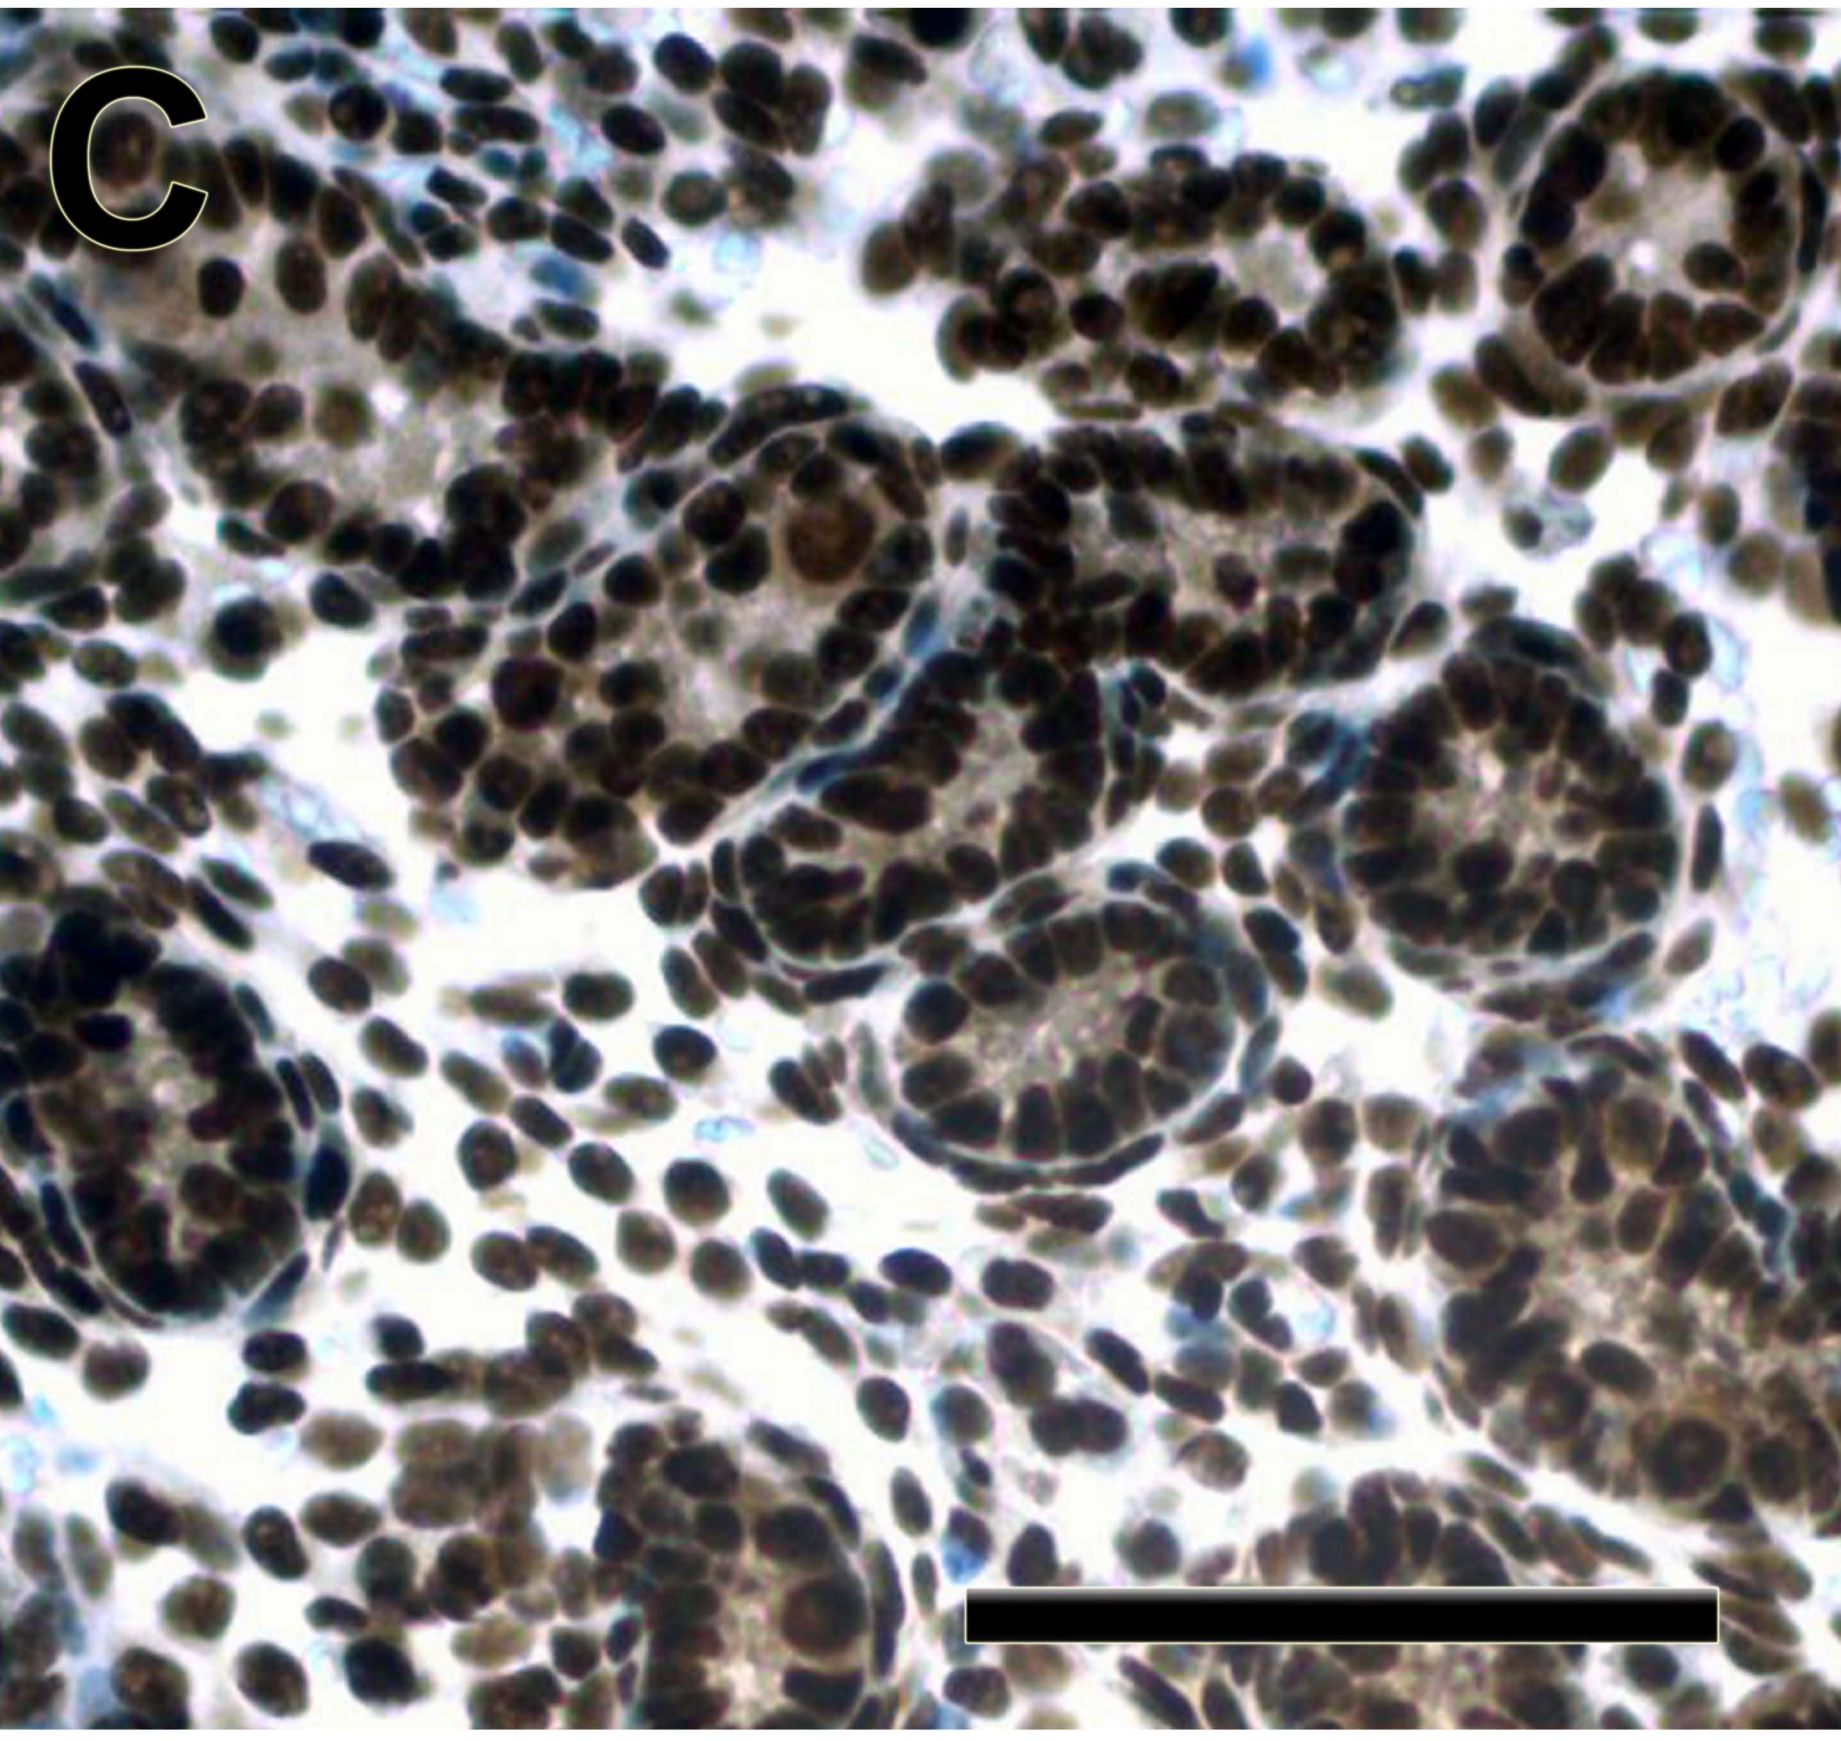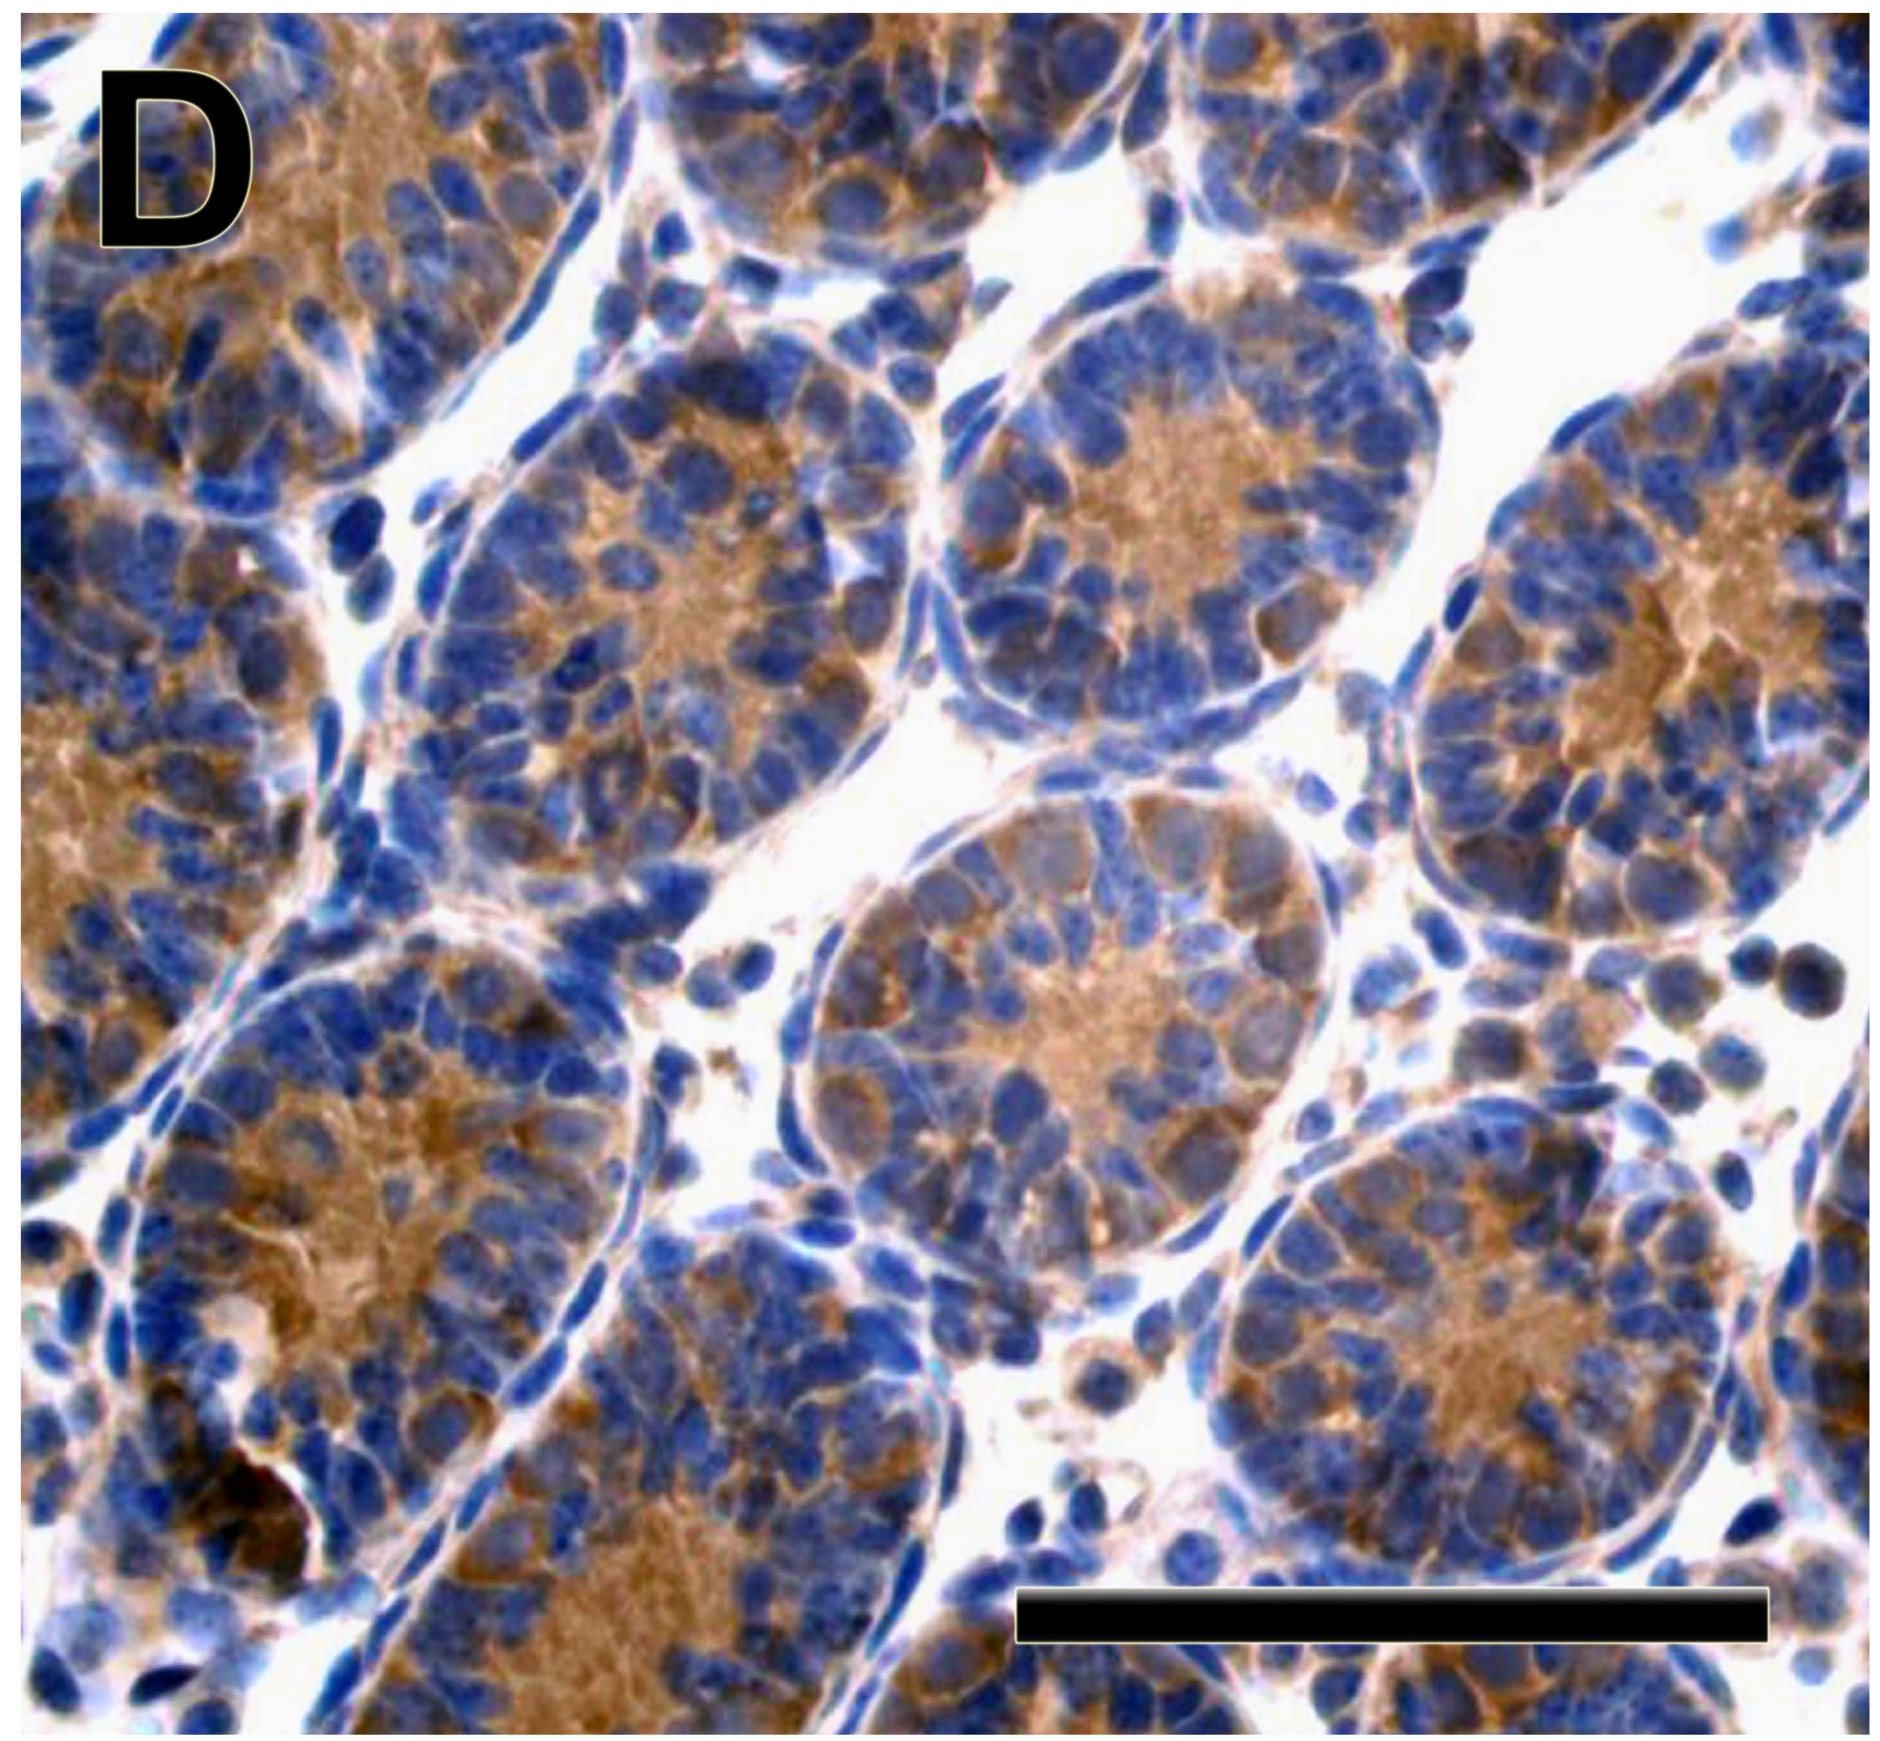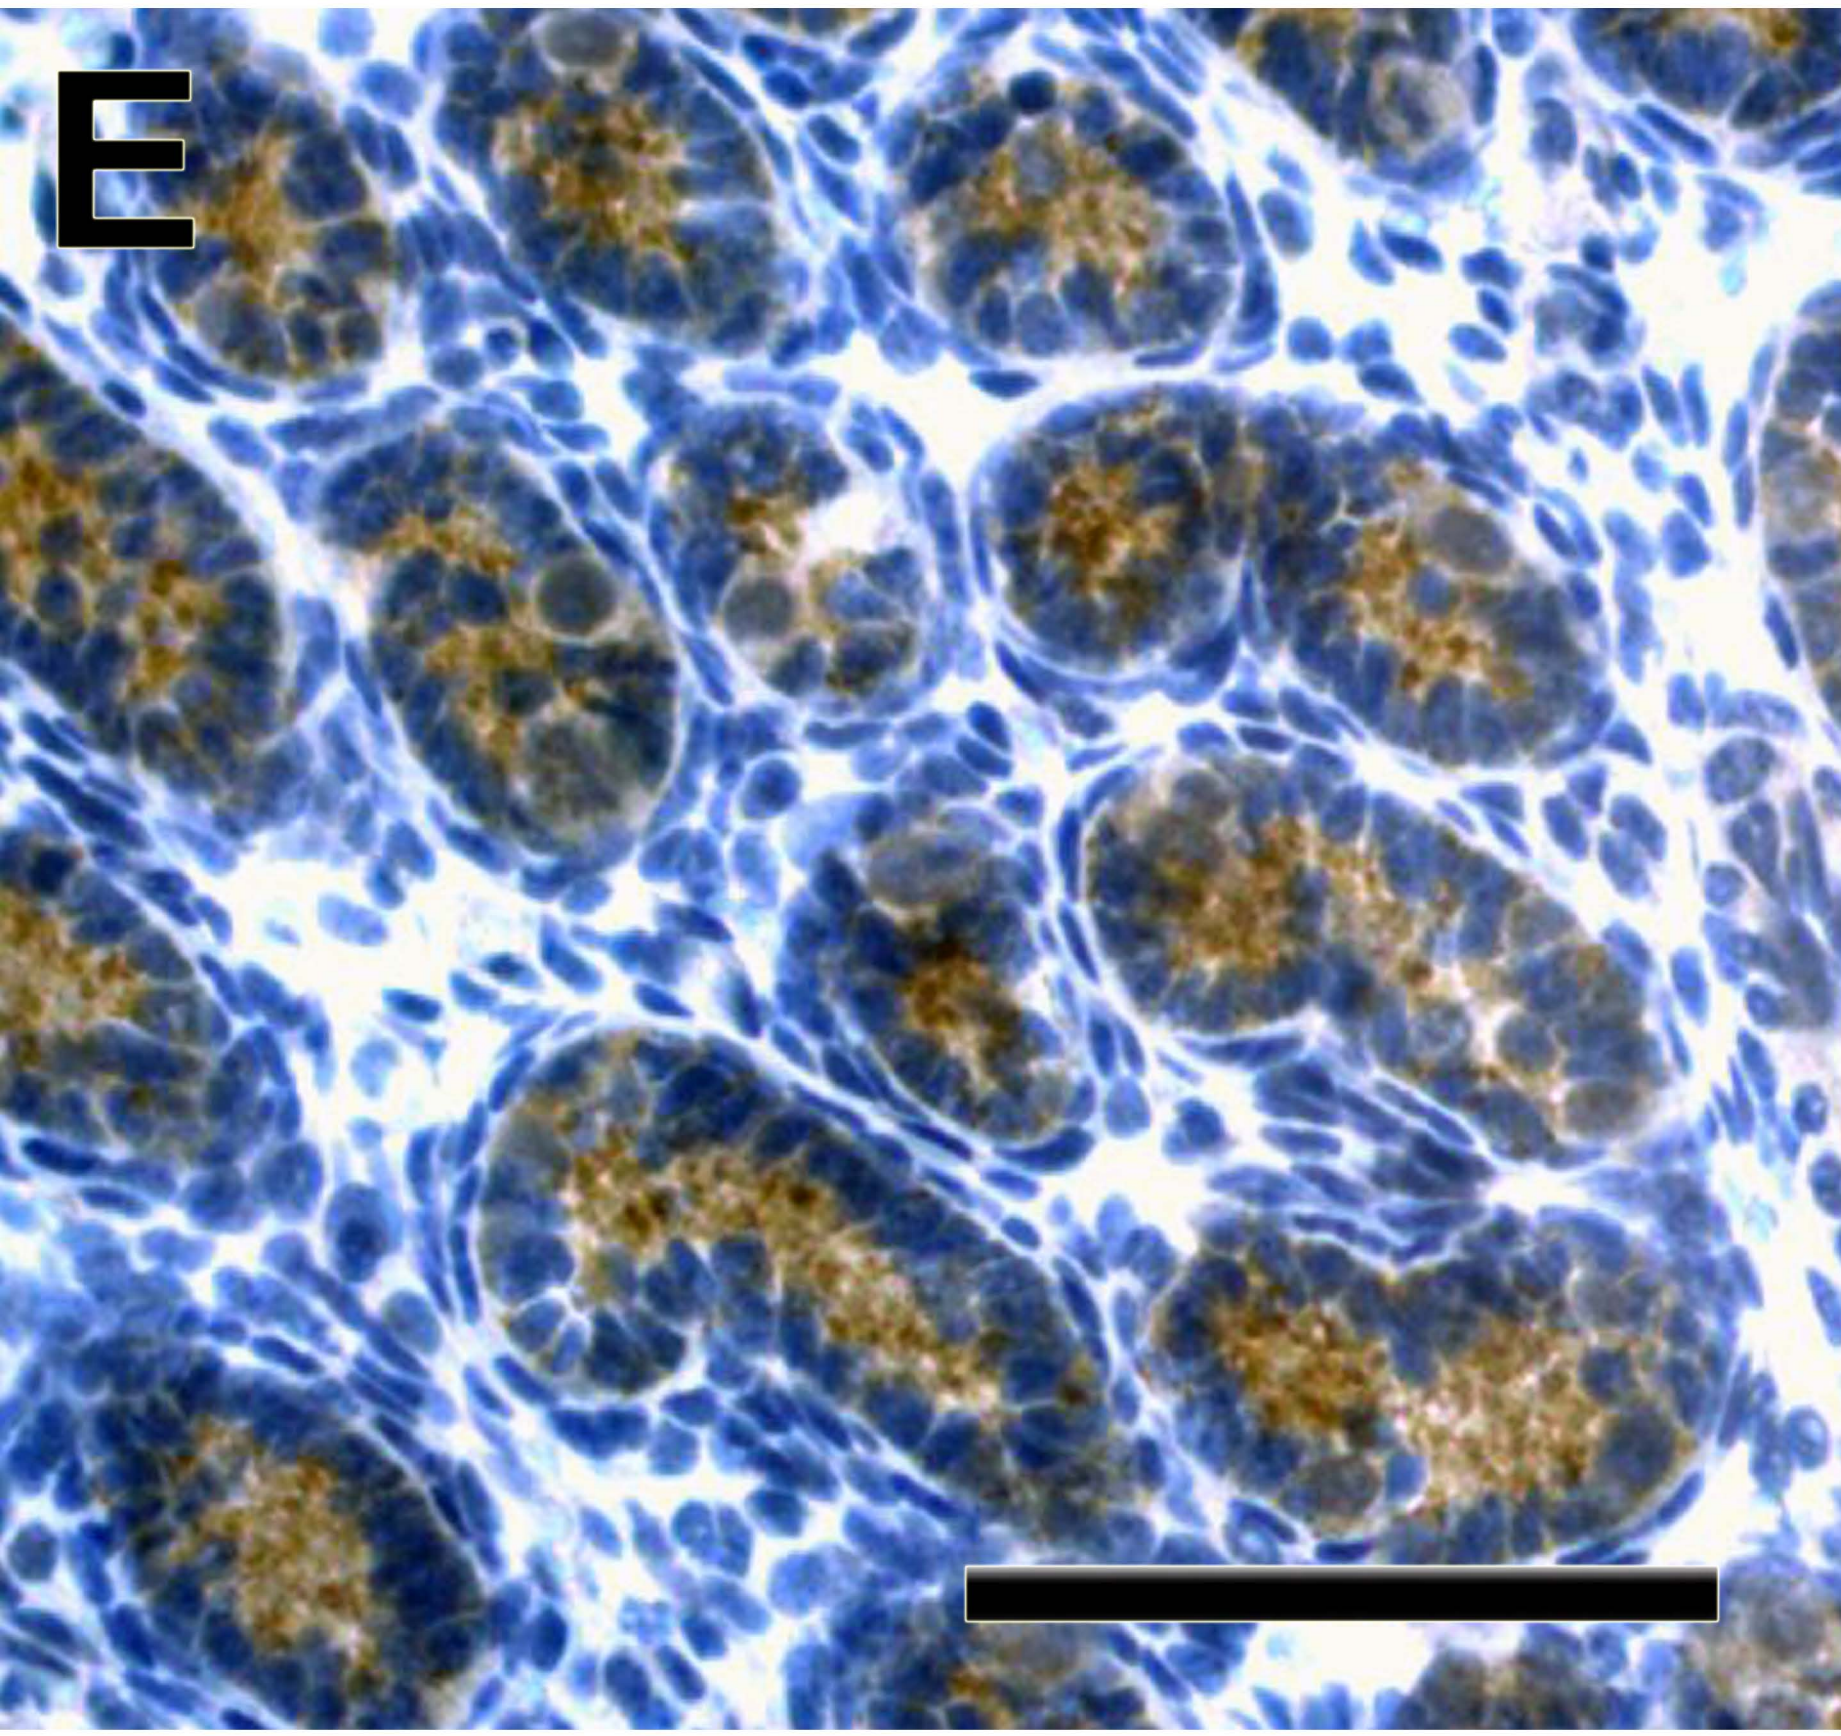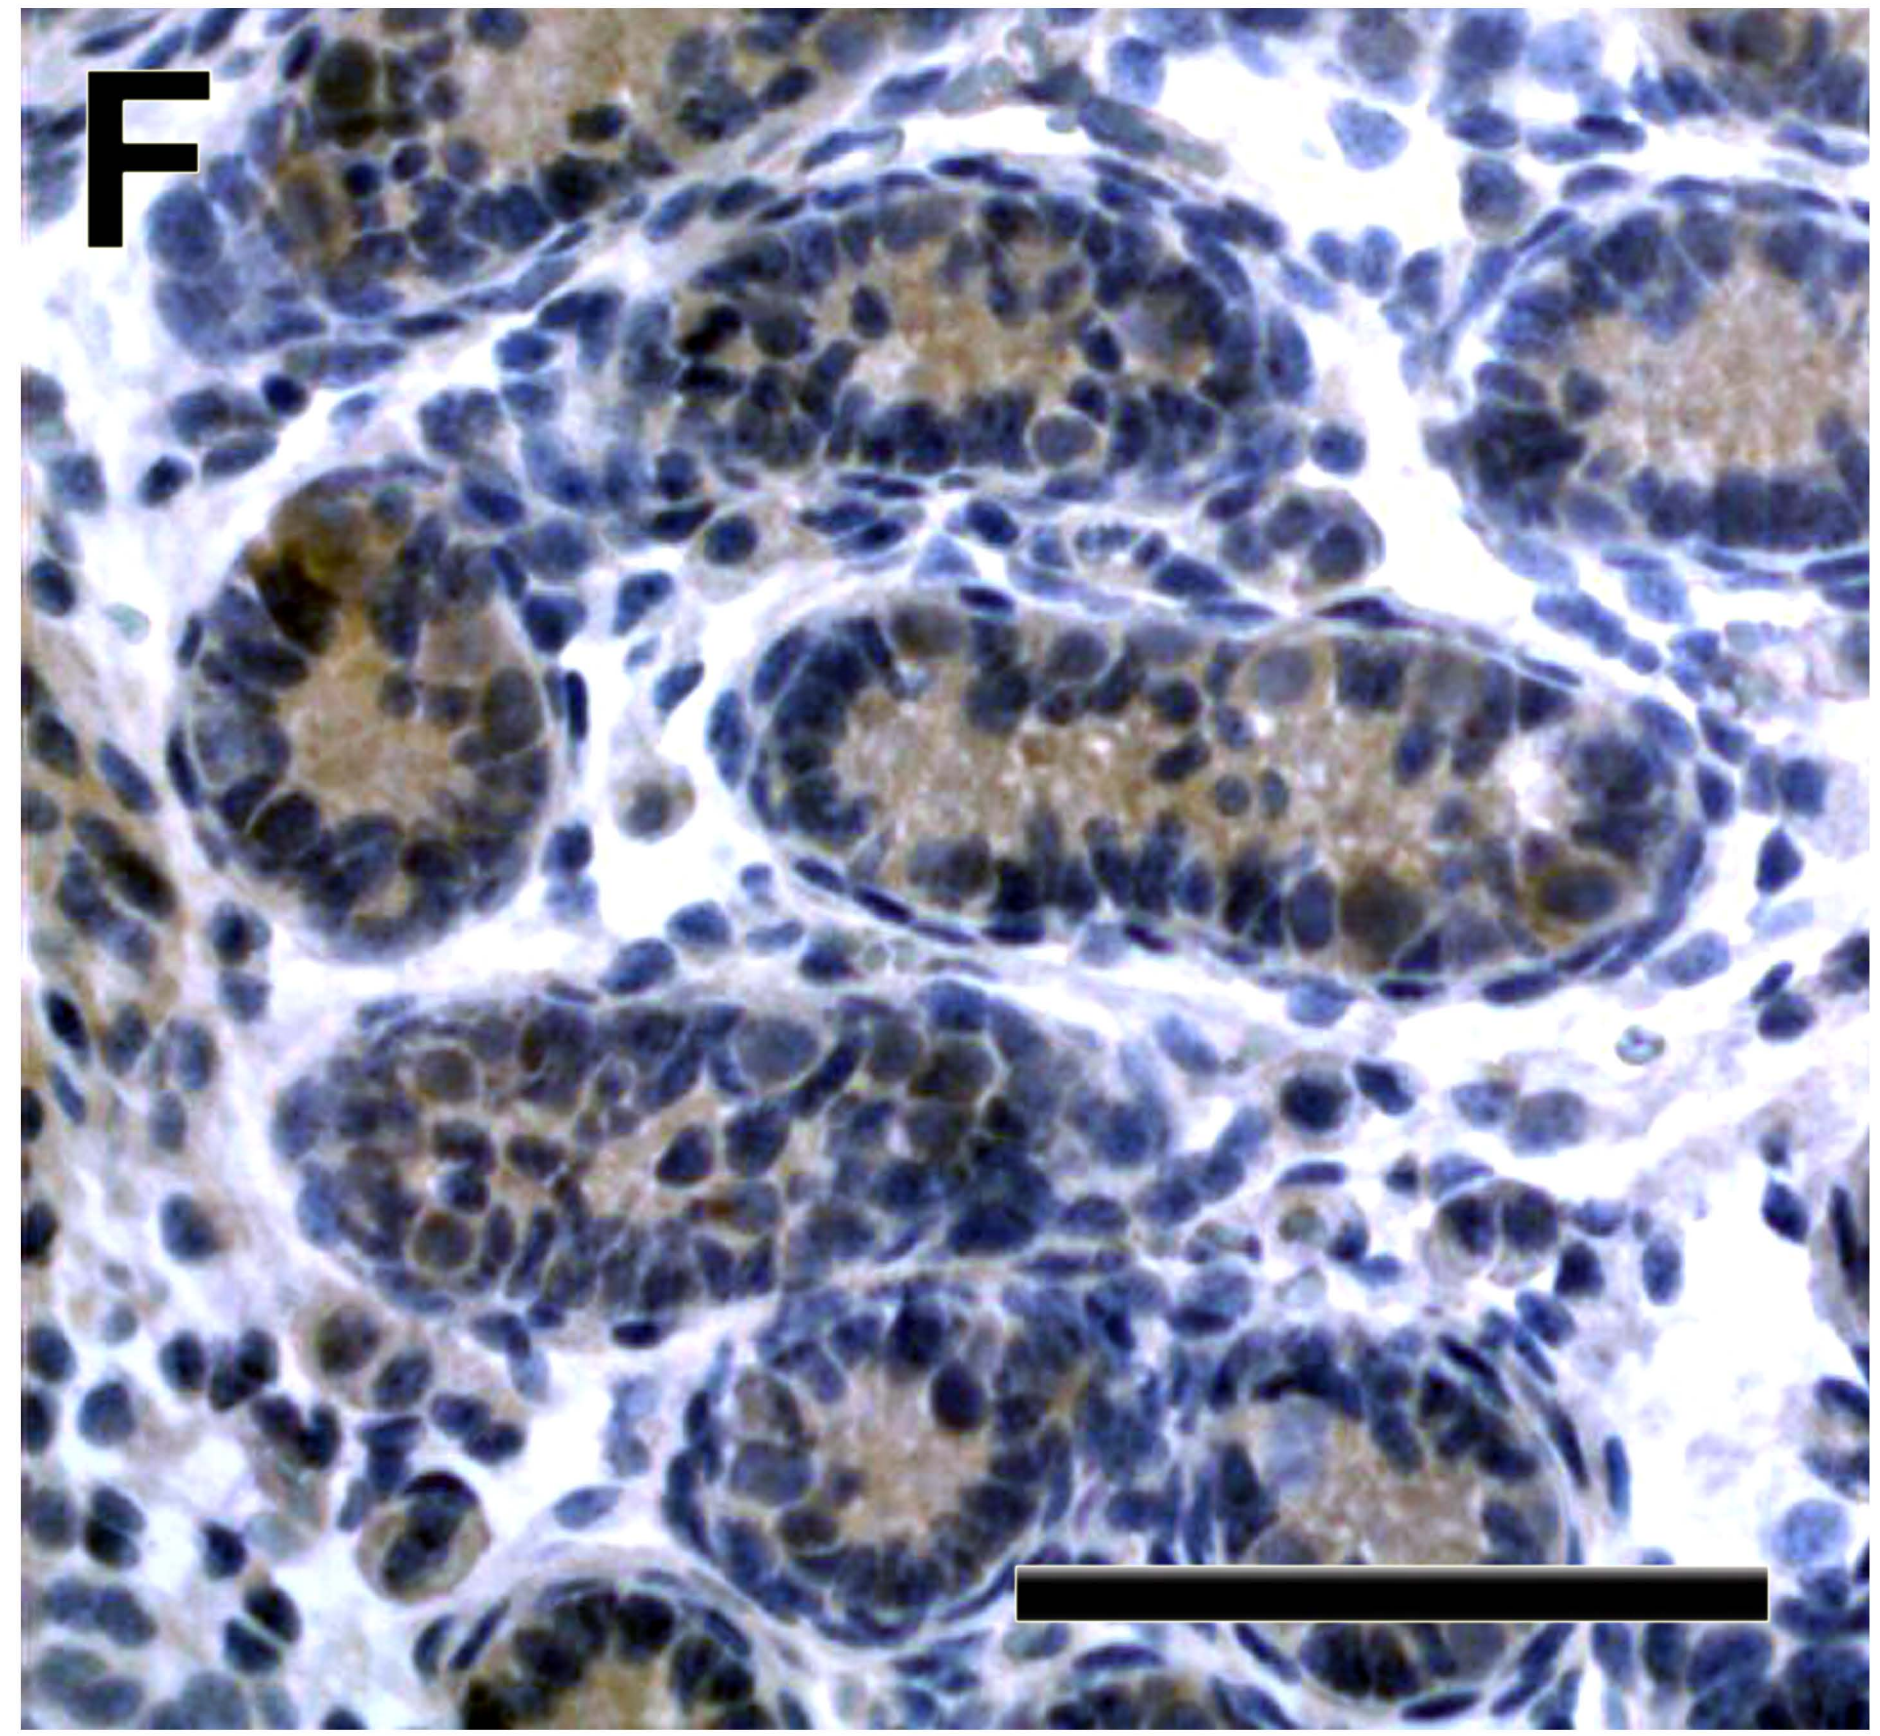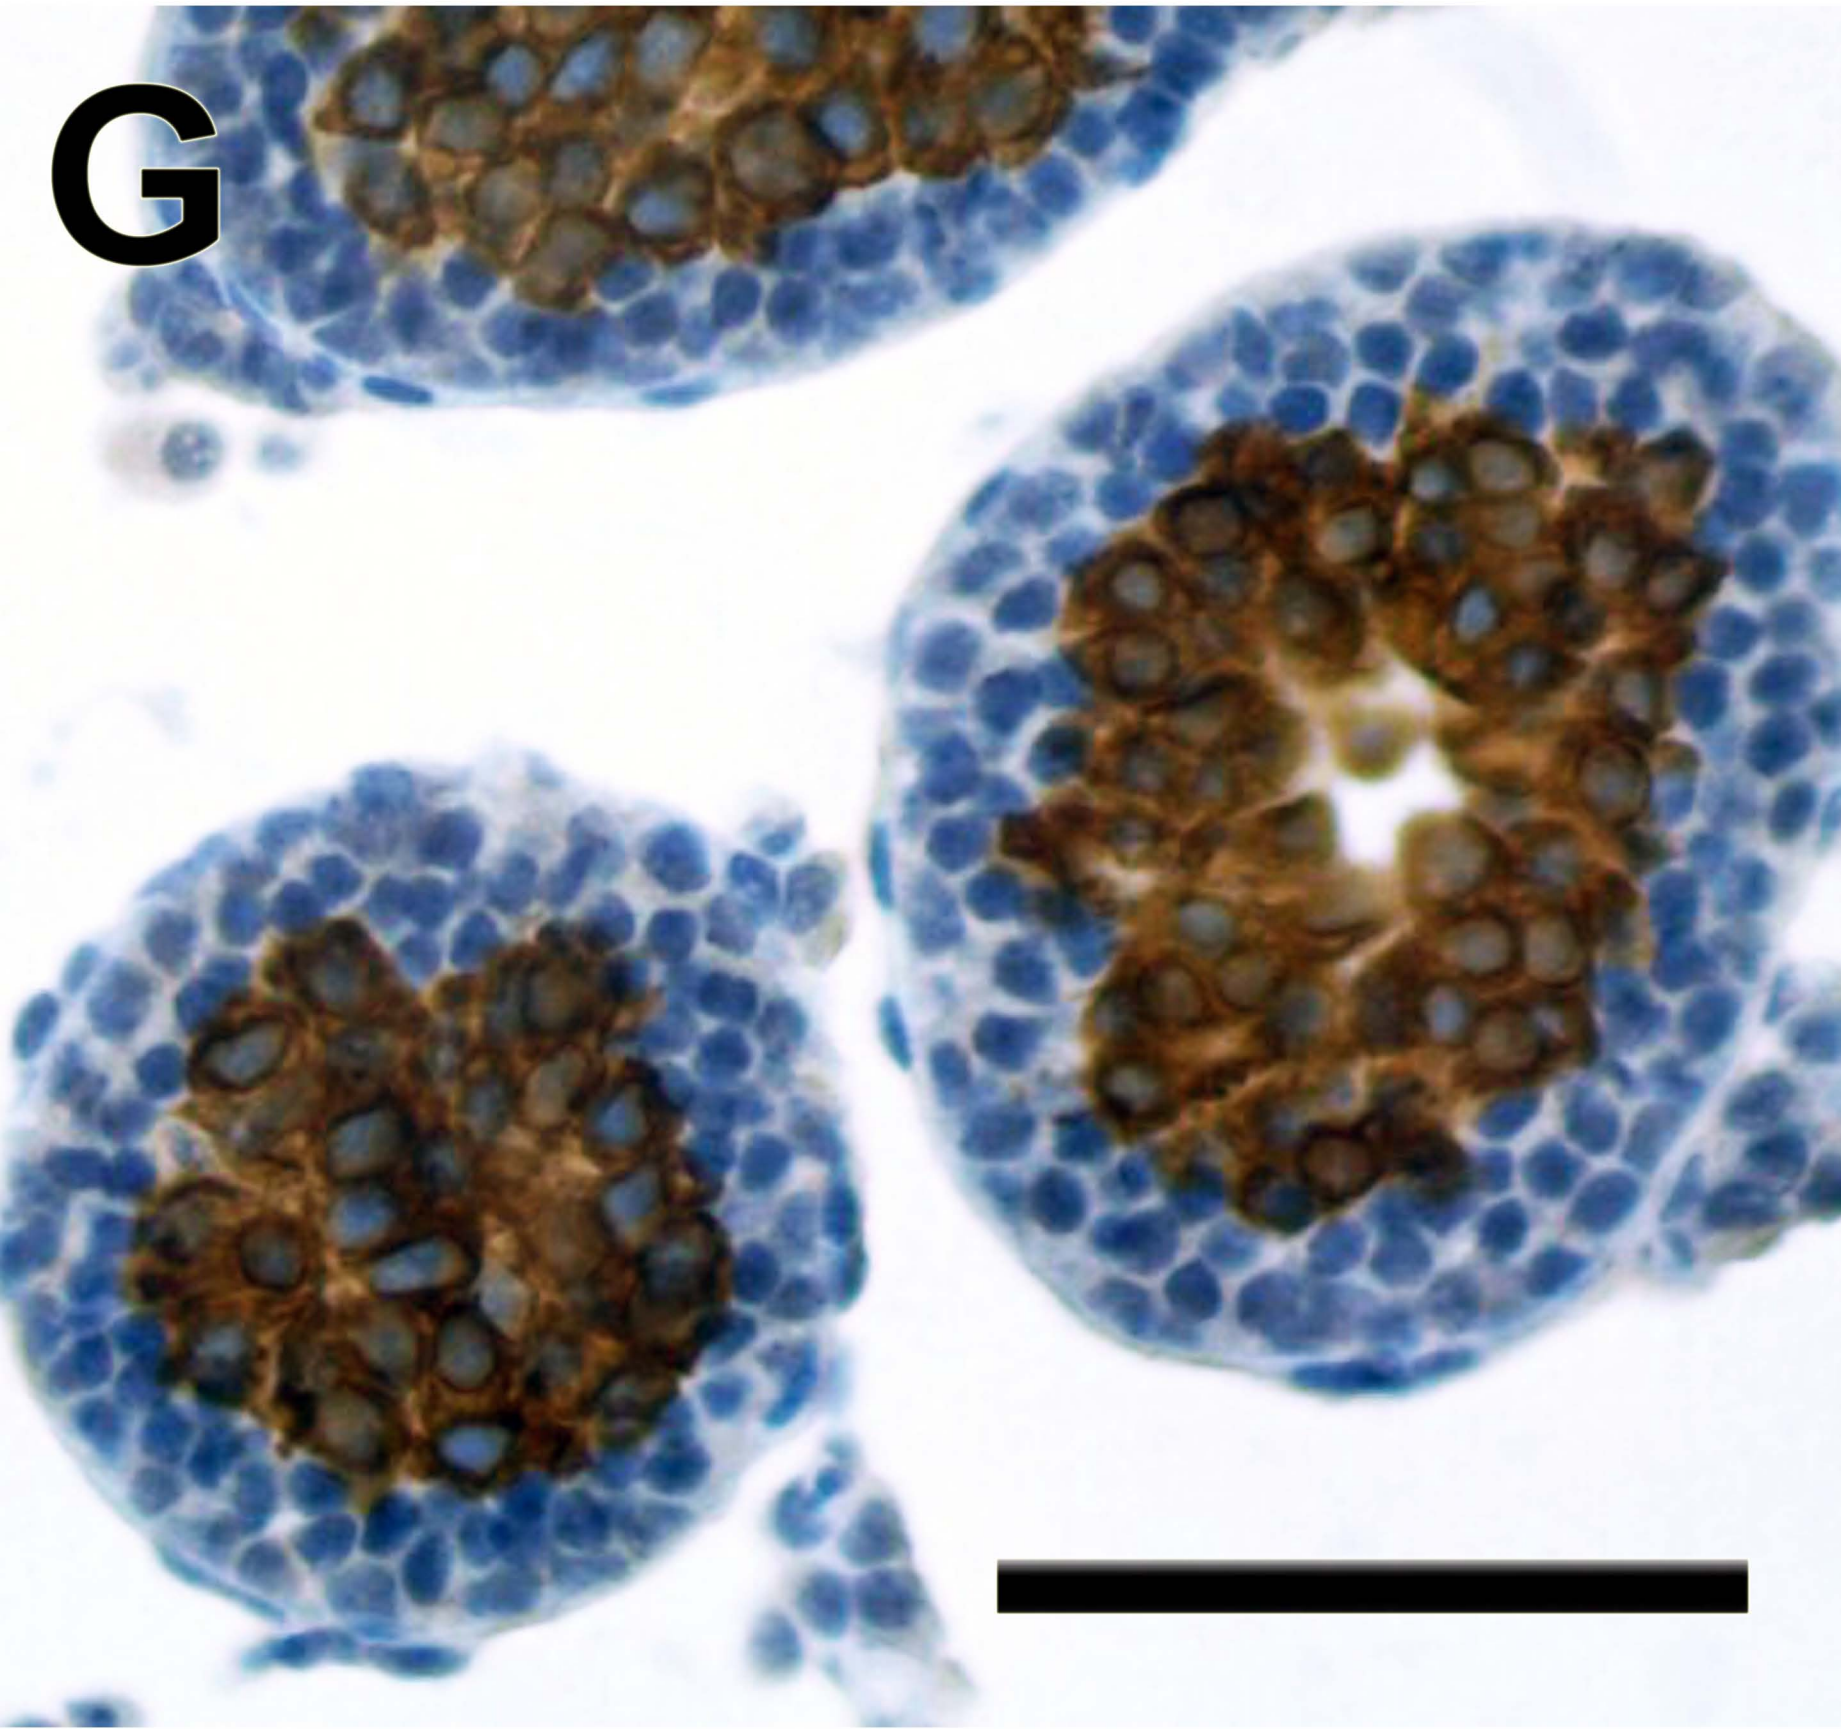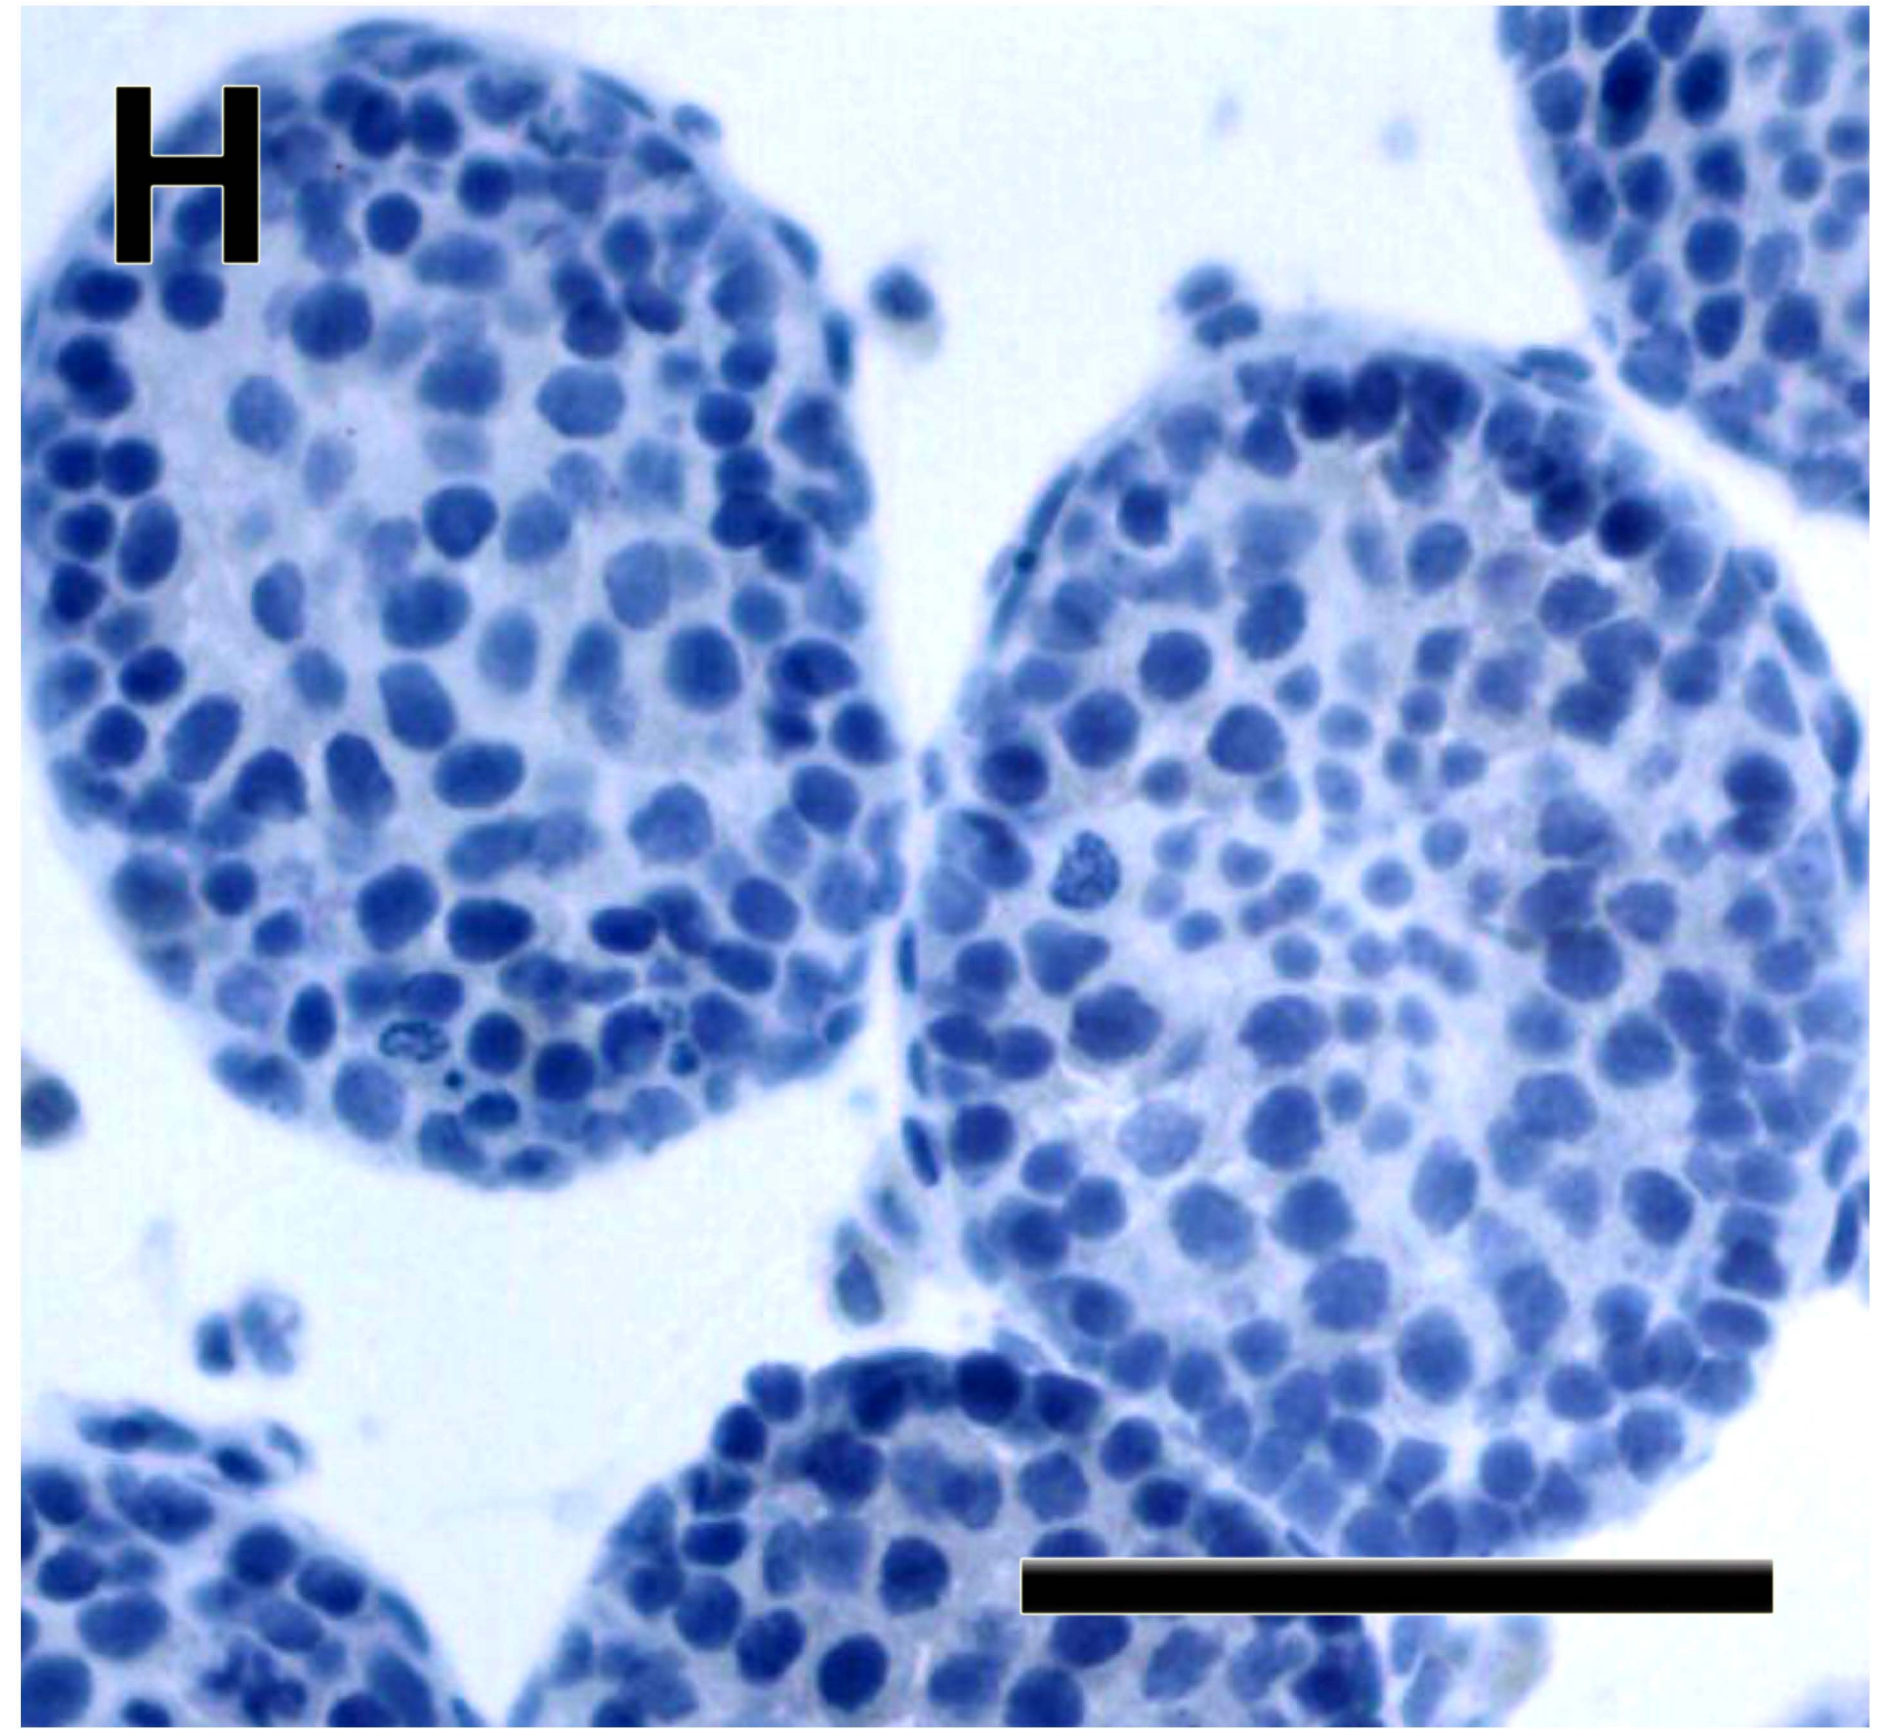

Supplement: supp_en.2011-1323_en-11-1323_figsx2.pdf [file supp_en.2011-1323_en-11-1323_figsx2.pdf]
